# Supplementary material for: microRNA-27a-3p but Not -5p Is a Crucial Mediator of Human Adipogenesis
Source: MDPI journal article supplement (doi:10.3390/cells10113205), 2021-11-17
Supplement: s1 [file s1]

# microRNA-27a-3p but Not -5p Is a Crucial Mediator of Human Adipogenesis

Hang Wu <sup>1</sup>, Taner Pula <sup>1</sup>, Daniel Tews <sup>2</sup>, Ez-Zoubir Amri <sup>3</sup>, Klaus-Michael Debatin <sup>1</sup>, Martin Wabitsch <sup>2</sup>, Pamela Fischer-Posovszky <sup>1</sup> and Julian Roos <sup>1,\*</sup>

**Citation:** Wu, H.; Pula, T.; Tews, D.; Amri, E.-Z.; Debatin, K.-M.; Wabitsch, M.; Fischer-Posovszky, P.; Roos, J. microRNA-27a-3p but Not -5p Is a Crucial Mediator of Human Adipogenesis. *Cells* **2021**, *10*, x.

<https://doi.org/10.3390/cells10113205>

Academic Editor: Ajit Vikram

Received: 27 October 2021

Accepted: 11 November 2021

Published: 17 November 2021

**Publisher's Note:** MDPI stays neutral with regard to jurisdictional claims in published maps and institutional affiliations.

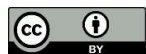

**Copyright:** © 2021 by the authors. Licensee MDPI, Basel, Switzerland. This article is an open access article distributed under the terms and conditions of the Creative Commons Attribution (CC BY) license

(<https://creativecommons.org/licenses/by/4.0/>).

<sup>1</sup> Department of Pediatrics and Adolescent Medicine, Ulm University Medical Center, 89075 Ulm, Germany; hang.wu@uni-ulm.de (H.W.); taner.pula@uni-ulm.de (T.P.); klaus-michael.debatin@uniklinik-ulm.de (K.-M.D.); Pamela.Fischer@uniklinik-ulm.de (P.F.-P.)

<sup>2</sup> Division of Pediatric Endocrinology and Diabetes, Department of Pediatrics and Adolescent Medicine, Ulm University Medical Center, 89075 Ulm, Germany; Daniel.Tews@uniklinik-ulm.de (D.T.); martin.wabitsch@uniklinik-ulm.de (M.W.)

<sup>3</sup> Inserm, CNRS, iBV, Université Côte d'Azur, 06103 Nice, France; Ez-Zoubir.Amri@unice.fr (E.-Z.A)

\* Correspondence: julian.roos@uni-ulm.de; Tel.: +49 731 500 57255

## Supplementary Materials:

Figure S1: Verification of SGBS cell differentiation.

Figure S2: Micrographs of miR-27a-5p and -3p gain-of-function in SGBS cells.

Figure S3: MiR-27a-5p and -3p do not affect cell proliferation in SGBS pre-adipocytes.

Figure S4: Densitometric analysis of LPL in SGBS cell transfected with miR-27a-3p.

Figure S5: MiR-27a-3p decreases LPL expression in hMADS cells.

Figure S6: Knockdown of LPL does not alter morphology of SGBS cell differentiation.

Figure S7: Adipogenic differentiation is not affected by LPL knockdown.

Figure S8: PPAR $\gamma$  is regulated by miR-27a-3p in SGBS and hMADS cells.

Figure S9: Knock-down of PPAR $\gamma$  impairs adipogenesis of SGBS cells.

Figure S10: Adipogenic differentiation is enhanced by miR-27a-3p inhibitor in SGBS cells.

Figure S11: Lower dose of miR-27a-3p can decrease adipogenic differentiation in SGBS cells.

Figure S12: miR-27a-3p and -5p expression is increased in gonadal WAT after 8 weeks of high-fat diet (HFD).

Table S1: Significant results of the EnrichR analysis for WikiPathway.

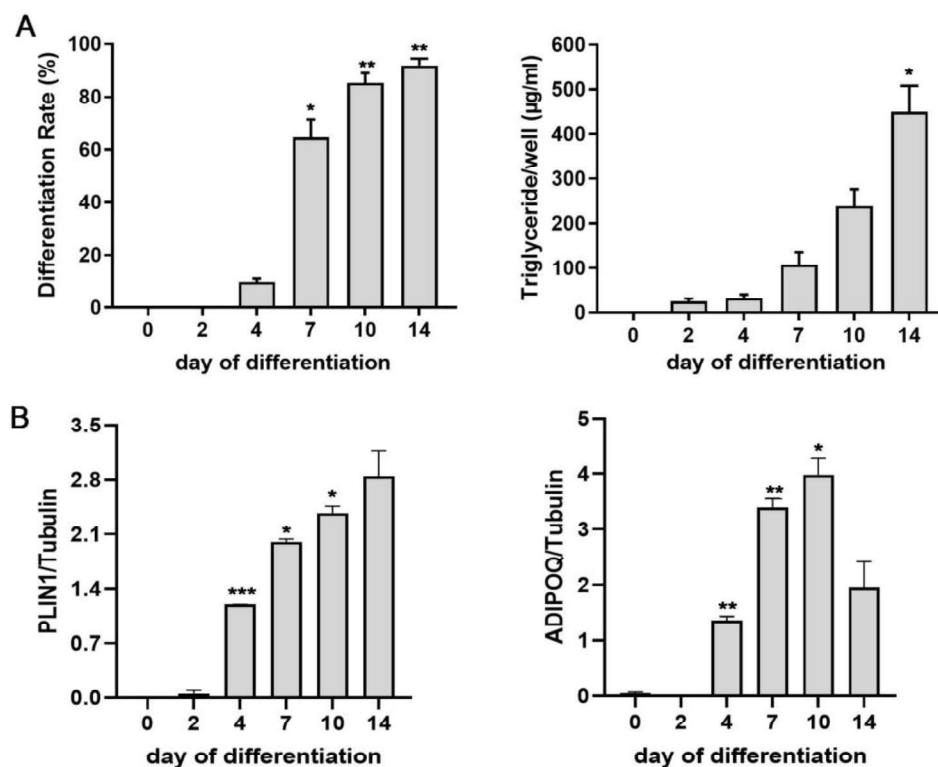

**Figure S1.** Verification of SGBS cell differentiation. (A) Differentiation rate and triglyceride content on day 0, 2, 4, 7, 10 and 14 during SGBS cell differentiation process. (B) Densitometric analysis of Western blot experiments during SGBS adipogenesis. Statistics: results are displayed as mean +SEM of four independent experiments. One-way ANOVA with Dunnett correction related to day 0; \* $p < 0.05$ ; \*\* $p < 0.01$ ; \*\*\* $p < 0.001$ . PLIN1: perilipin, ADIPOQ: adiponectin.

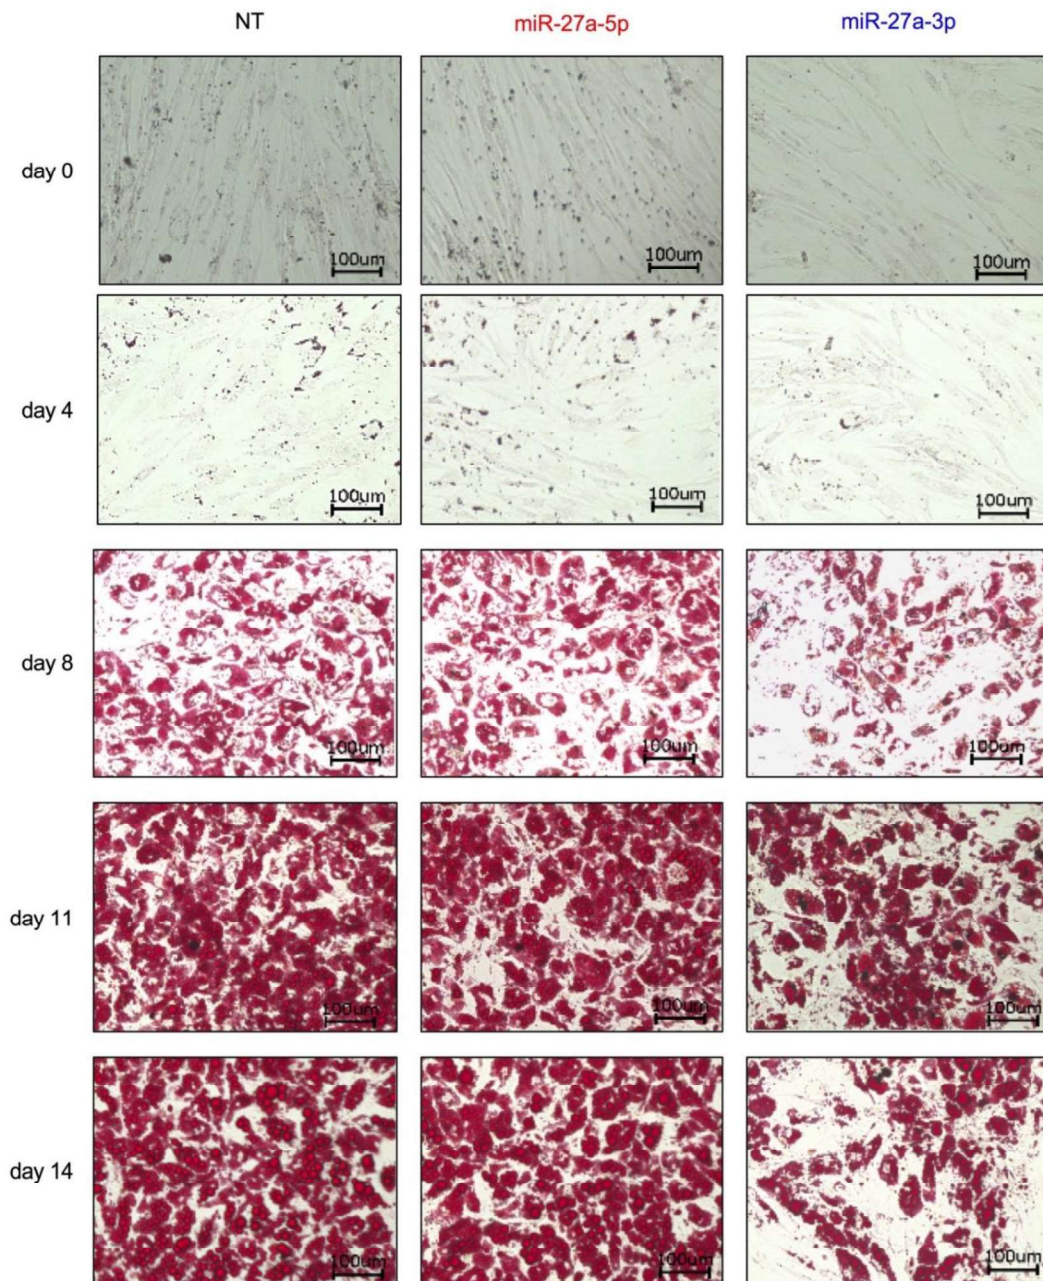

**Figure S2.** Micrographs of miR-27a-5p and -3p gain-of-function in SGBS cells. To assess the effect of miR-27a-5p and -3p on human adipogenesis, SGBS preadipocytes were transfected 48h prior adipogenic induction with miRNA mimics or non-target control (NT, 20nM). Cells were stained with Oil red O at indicated time points. Lipid droplets are stained in red.

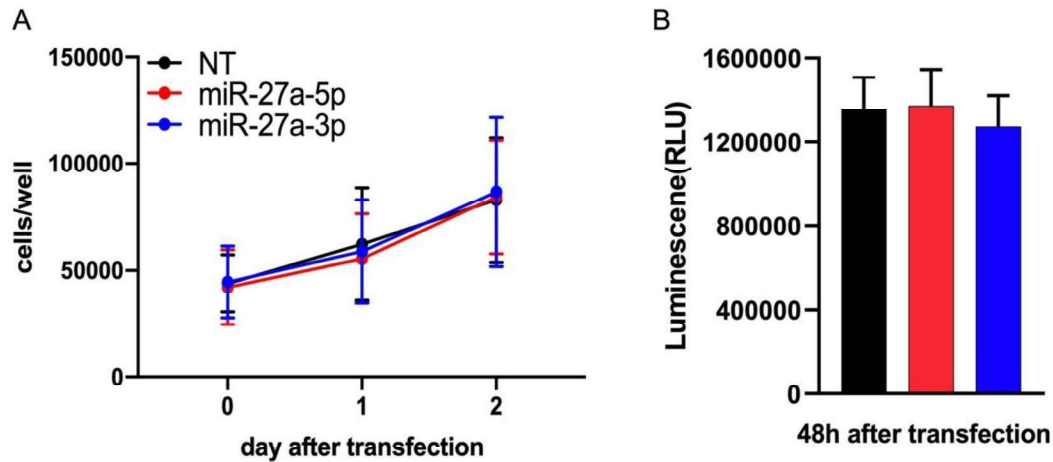

**Figure S3.** miR-27a-5p and -3p do not affect cell proliferation in SGBS pre-adipocytes. To assess the effect of miR-27a-5p and -3p on SGBS cell proliferation, SGBS preadipocytes were transfected with miRNA mimics or non-target control (NT, 20nM) 48h prior adipogenic induction. (A) SGBS preadipocytes were counted just before transfection and 24h, 48h post transfection. (B) CellTiter-Glo assay was applied 48h post transfection among all three conditions (NT/miR-27a-5p/-3p). Statistics: results are displayed as mean and SEM of three independent experiments. One-way ANOVA with Dunnett correction related to NT of the same time point.

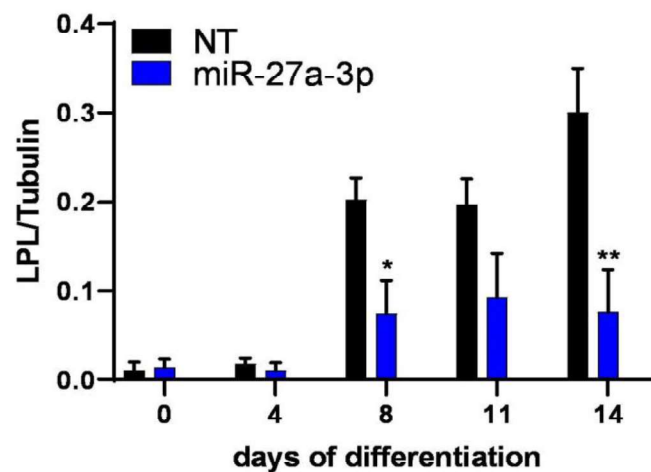

**Figure S4.** Densitometric analysis of LPL in SGBS cell transfected with miR-27a-3p. To assess if miR-27a-3p regulates its predicted target Lipoprotein Lipase (LPL), SGBS preadipocytes were transfected with miRNA mimics or non-target control (NT, 20nM) 48h prior adipogenic induction. Protein samples were collected on day 0, 4, 8, 11, 14 of adipogenesis. Densitometric analysis of three Western blots of LPL with Tubulin as loading control. Statistics: results are displayed as mean and SEM of three independent experiments. Two-way ANOVA with Bonferroni correction related to NT of the same time point; \* $p < 0.05$ ; \*\* $p < 0.01$ .

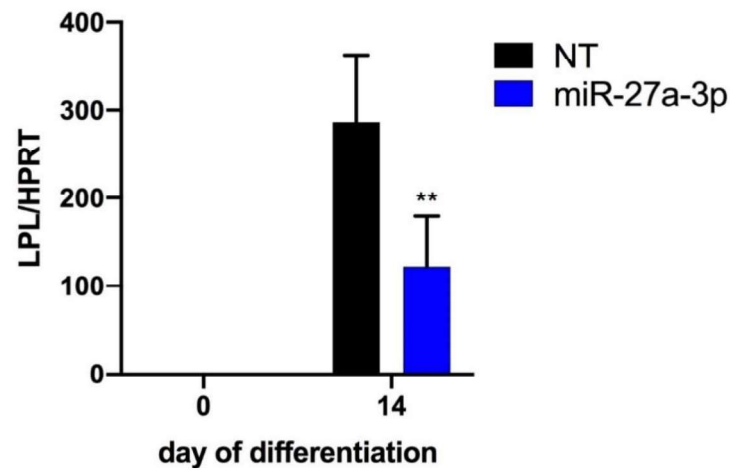

**Figure S5.** miR-27a-3p decreases LPL expression in hMADS cells. To assess if miR-27a-3p regulates its predicted target Lipoprotein Lipase (LPL), hMADS preadipocytes were transfected with miRNA mimics or non-target control (NT, 20nM) 48h prior adipogenic induction. RNA samples were collected on day 0 and 14 of adipogenesis. LPL mRNA expression quantified by qPCR related to HPRT. Statistics: results are displayed as mean +SEM of five independent experiments. Two-way ANOVA with Dunnett correction related to NT of the same time point; \* $p < 0.05$ . HPRT: Hypoxanthine-Guanin-Phosphoribosyltransferase. hMADS: human multipotent adipose-derived stem cells.

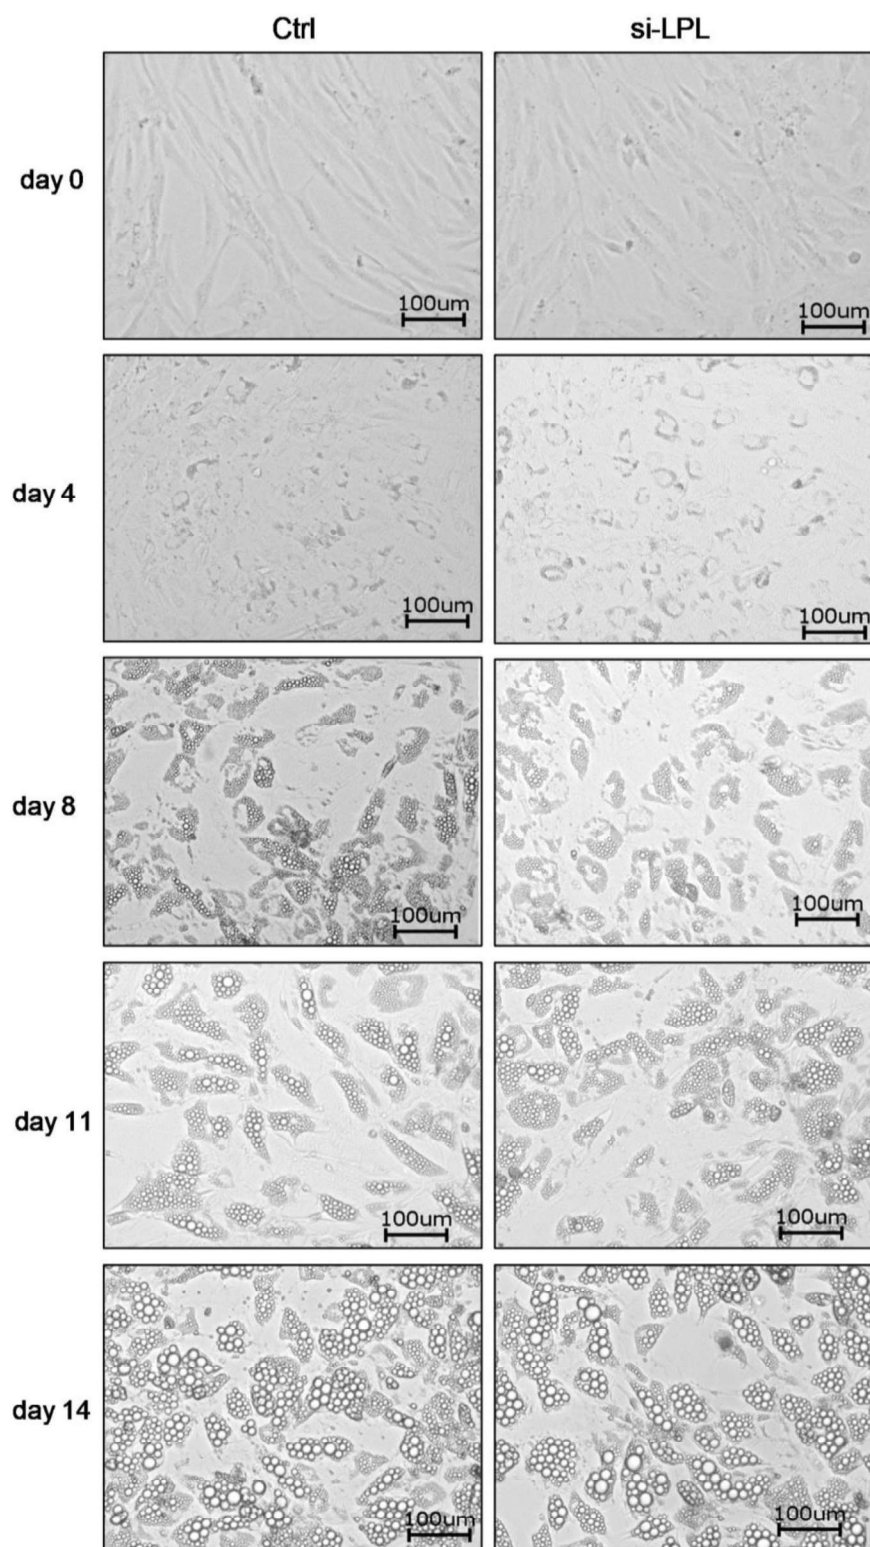

**Figure S6.** Knockdown of LPL does not alter morphology of SGBS cell differentiation. To assess if the miR-27a-3p target LPL regulates human adipogenesis, SGBS preadipocytes were transfected 48h prior adipogenic induction with either control non-target (Ctrl) or an siRNA pool targeting human LPL (si-LPL, 20nM). Micrographs were taken at indicated time points.



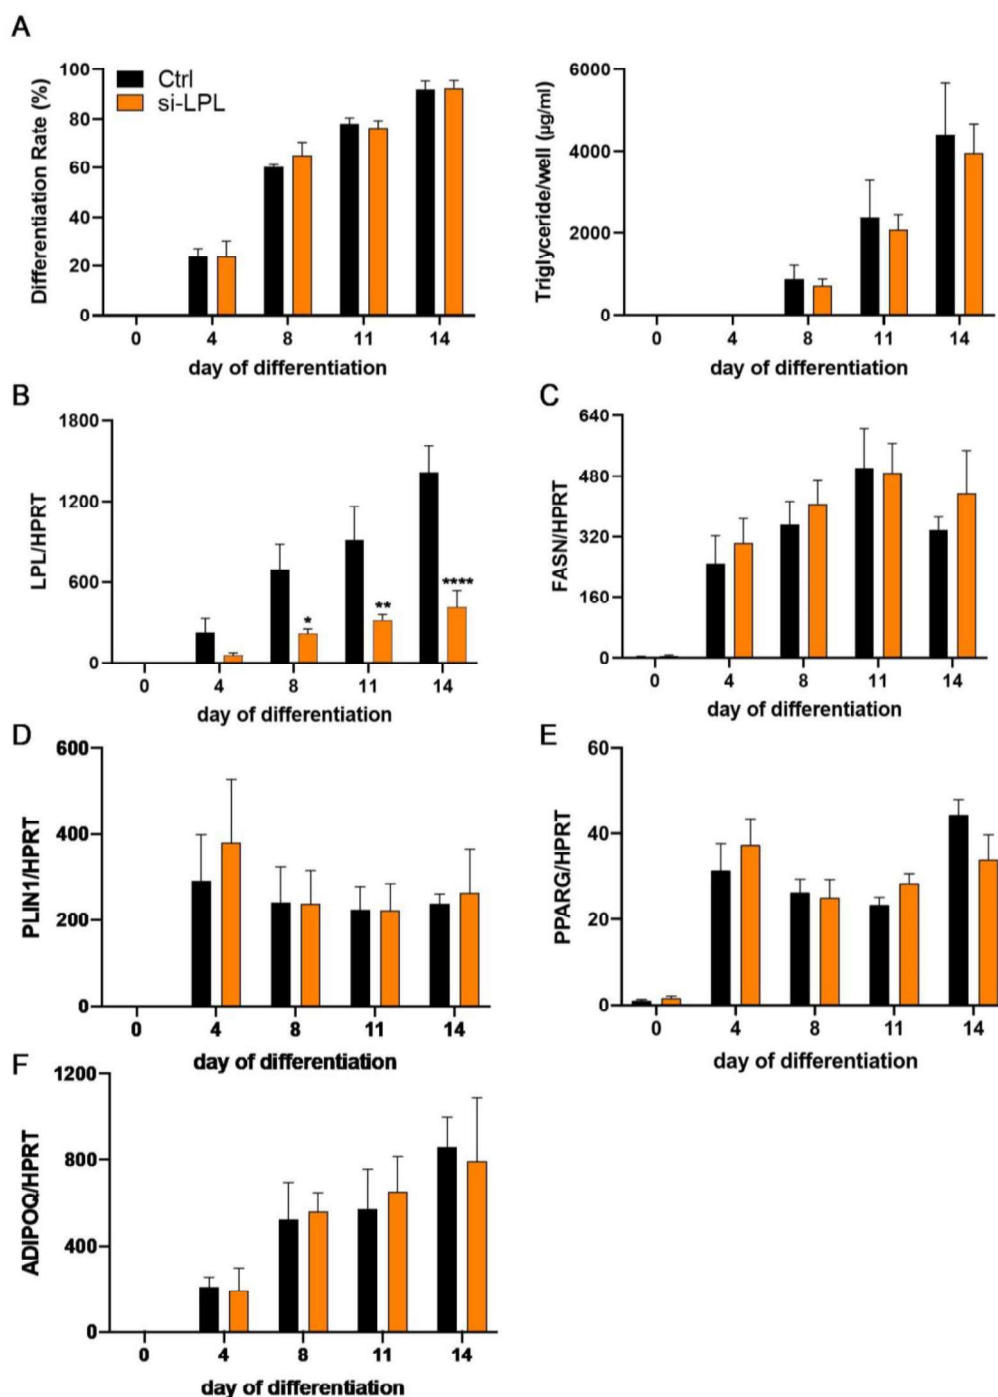

**Figure S7.** Adipogenic differentiation is not affected by LPL knockdown. To assess if the miR-27a-3p target LPL regulates human adipogenesis, SGBS preadipocytes were transfected with either control non-target (Ctrl) or an siRNA pool targeting human LPL (si-LPL, 20nM) 48h prior adipogenic induction. (A) Differentiation rate and triglyceride content at indicated time points during SGBS cell differentiation. mRNA expression of LPL (B) and adipogenic markers (C-F) quantified by qPCR related to HPRT. Statistics: results are displayed as mean +SEM of three independent experiments. Two-way ANOVA with Bonferroni correction related to Ctrl of the same time point; \* $p < 0.05$ ; \*\* $p < 0.01$ ; \*\*\*\* $p < 0.0001$ . HPRT: Hypoxanthine-Guanin-Phosphoribosyltransferase, LPL: lipoprotein lipase, FASN: fatty acid synthase, PLIN1: perilipin, PPAR $\gamma$ : peroxisome proliferator-activated receptors  $\gamma$ , ADIPOQ: adiponectin.

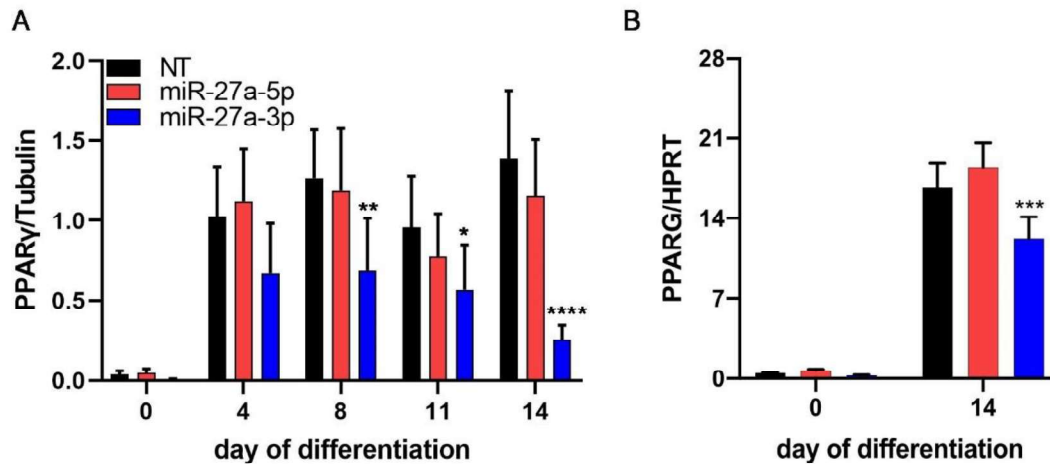

**Figure S8.** PPAR $\gamma$  is regulated by miR-27a-3p in SGBS and hMADS cells. To assess if miR-27a-3p regulates its predicted target PPAR $\gamma$ , SGBS or hMADS preadipocytes were transfected with miRNA mimics or non-target control (NT, 20nM) 48h prior adipogenic induction. (A) Densitometric analysis of three Western blots of PPAR $\gamma$  with Tubulin as loading control in SGBS cells. (B) mRNA expression of PPARG was quantified by qPCR related to HPRT in hMADS cells. Statistics: results are displayed as mean + SEM of 3 independent experiments. Two-way ANOVA with Dunnett correction related to NT of the same time point; \* $p < 0.05$ , \*\* $p < 0.01$ , \*\*\* $p < 0.001$ , \*\*\*\* $p < 0.0001$ . HPRT: Hypoxanthine-Guanin-Phosphoribosyltransferase, PPAR $\gamma$ /PPARG: Peroxisome Proliferator-activated Receptor  $\gamma$ .

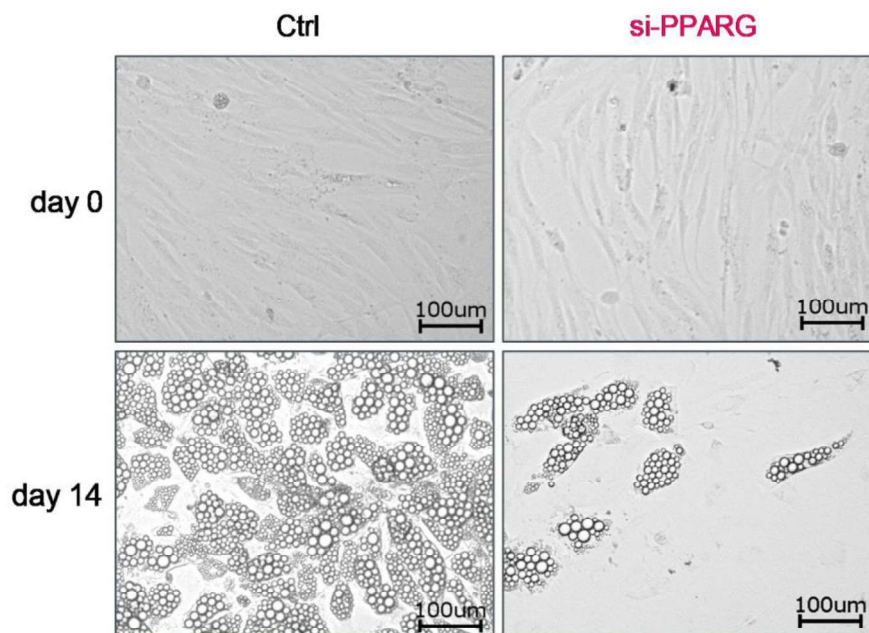

**Figure S9.** Knock-down of PPAR $\gamma$  impairs adipogenesis of SGBS cells. To assess if the miR-27a-3p target PPAR $\gamma$  regulates human adipogenesis, SGBS preadipocytes were transfected 48h prior adipogenic induction with either control non-target (Ctrl) or an siRNA pool targeting human PPARG (si-PPARG, 20nM). Microphotographs were taken at indicated time points. PPARG: Peroxisome Proliferator-activated Receptor  $\gamma$ .



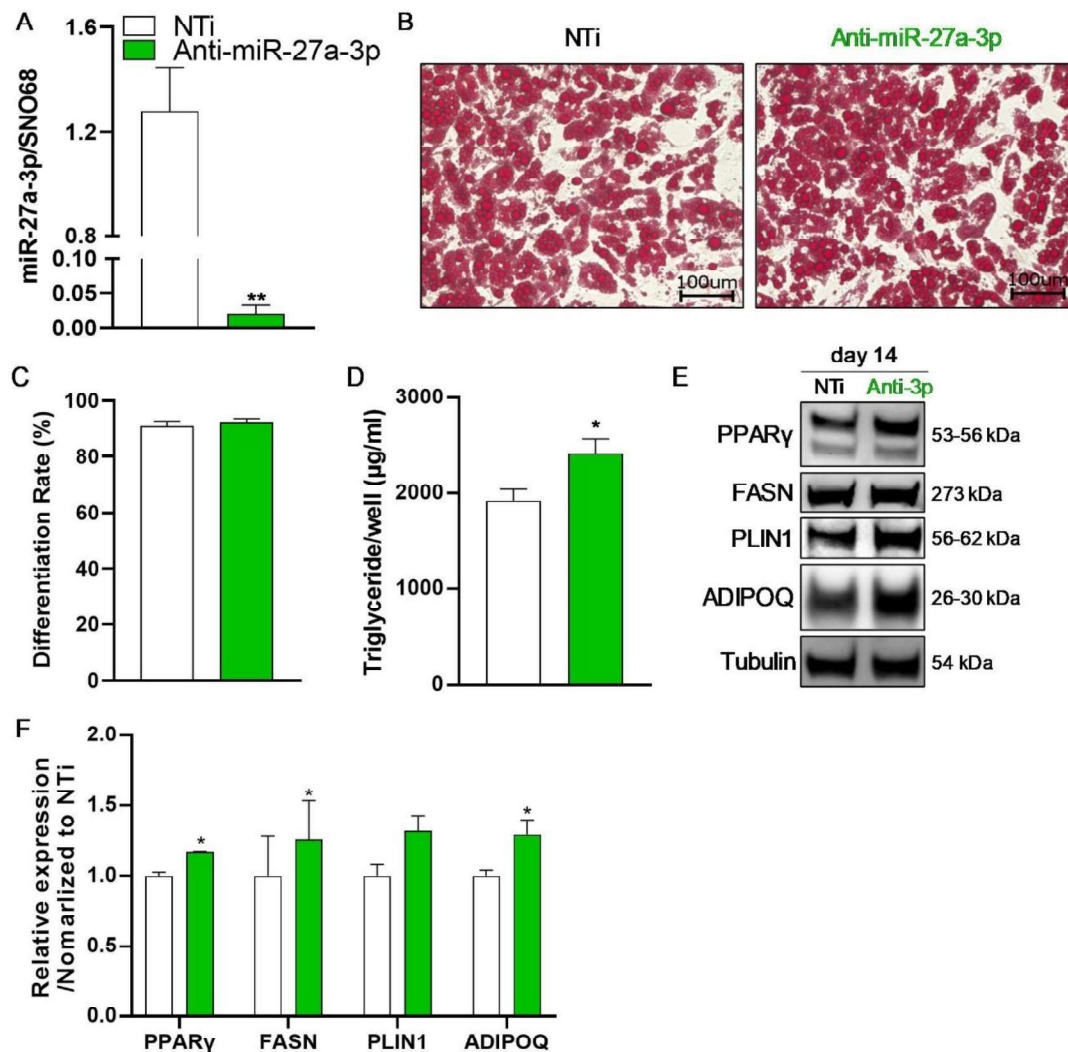

**Figure S10.** Adipogenic differentiation is enhanced by miR-27a-3p inhibitor in SGBS cells. To assess the effect of miR-27a-3p on SGBS cells, preadipocytes were transfected 48h prior adipogenic induction with miRNA inhibitor or non-target inhibitor (NTi, 50nM). (A) MiRNA expression on day 0 of adipogenic differentiation (48h after transfection quantified by qPCR and related to SNO68). (B) Microphotographs of transfected SGBS cells stained with Oil red O at day 14 of adipogenic differentiation. Lipid droplets are stained in red. (C) Differentiation rate and (D) triglyceride content on day 14 during the differentiation process. (E) One representative Western blot out of three independent experiments after miR-27a-3p inhibition in SGBS cells. (F) Densitometric analysis of three Western blots on day 14 of adipogenesis related to Tubulin. Statistics: results are displayed as mean and SEM of 3 independent experiments. T-test related to NTi; \* $p < 0.05$ , \*\* $p < 0.01$ . SNO68: SNORD68. PPAR $\gamma$ : peroxisome proliferator-activated receptors  $\gamma$ , FASN: fatty acid synthase, PLIN1: perilipin, ADIPOQ: adiponectin. Anti-3p: Anti-miR-27a-3p.

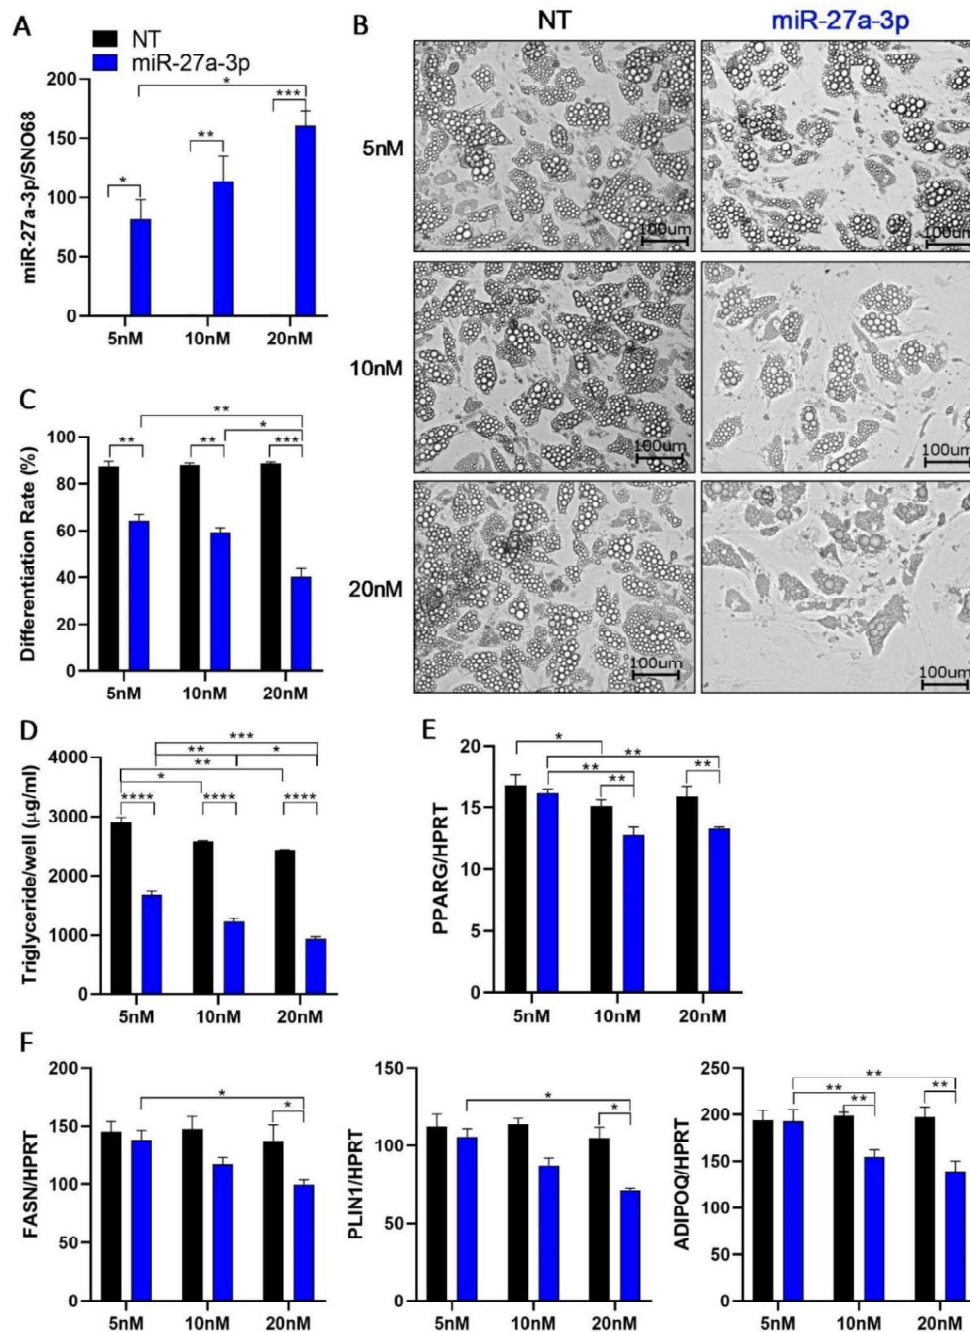

**Figure S11:** Lower dose of miR-27a-3p can decrease adipogenic differentiation in SGBS cells. To assess the effect of lower concentration of miR-27a-3p on human adipogenesis, SGBS preadipocytes were transfected 48h prior adipogenic induction with miRNA mimics or non-target control (NT) in different concentration (5nM, 10nM, 20nM). **(A)** miRNA expression on day 0 of adipogenic differentiation (48h after transfection quantified by qPCR and related to SNO68). **(B)** Micrographs of transfected SGBS cells on day 14. **(C)** Differentiation rate and **(D)** triglyceride content on day 14. **(E)** mRNA expression of PPARG quantified by qPCR related to HPRT. **(F)** mRNA expression of adipogenic markers Fatty Acid Synthase (FASN), Perilipin (PLIN1) and Adiponectin (ADIPOQ) quantified by qPCR related to HPRT. Statistics: results are displayed as mean and SEM of 3 independent experiments. Two-way ANOVA with Bonferroni correction as marked; \*p<0.05, \*\*p<0.01, \*\*\*p<0.001, \*\*\*\*p<0.0001. SNO68: SNORD68, HPRT: Hypoxanthine-Guanin-Phosphoribosyltransferase.

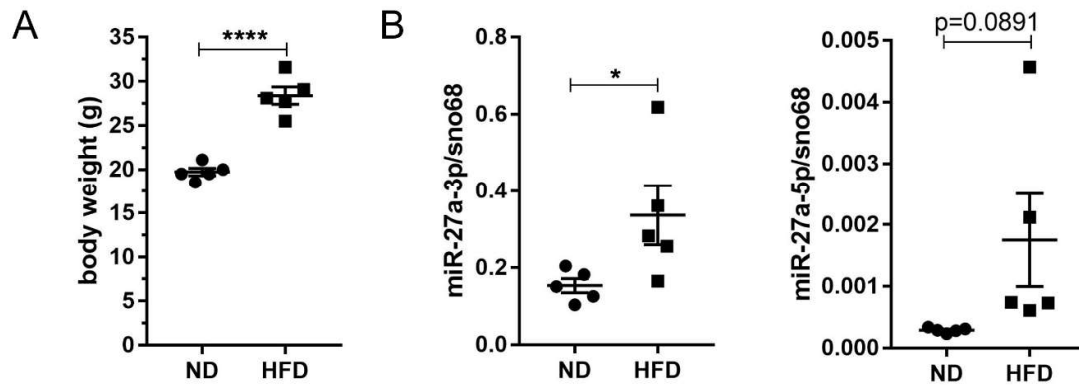

**Figure S12:** miR-27a-3p and -5p expression is increased in gonadal WAT after 8 weeks of high-fat diet (HFD). Female C57BL/6 J were fed a HFD (D12492n(I) mod. 60 kJ% fat from lard, Ssniff Spezialdiäten, Soest, Germany) or a respective control diet (normal diet, ND, D12450B mod. LS 13 kJ% fat from vegetable oil, Ssniff Spezialdiäten, Soest, Germany). **(A)** Body weight **(B)** miRNA expression quantified by qPCR and related to SNO68. Statistics: results are displayed as mean and SEM of 5 mice per group. Unpaired two-sided t-test ; \* $p < 0.05$ , \*\*\*\* $p < 0.0001$ . SNO68: SNORD68

**Table S1.** Significant results of the EnrichR analysis for WikiPathway. 724 genes which are predicted as targets of miR-27a-3p by three databases (TargetScan, miRWalk and StarBase) were analyzed using EnrichR [32]. The biological pathway database WikiPathway revealed 60 significantly enriched pathways (adjusted P-value<0.01).

| Term                                                                 | Overlap | Adjusted P-value      | Genes                                                                                                                                                          |
|----------------------------------------------------------------------|---------|-----------------------|----------------------------------------------------------------------------------------------------------------------------------------------------------------|
| ErbB Signaling Pathway WP673                                         | 19/91   | $1.83 \times 10^{-7}$ | SHC4, GSK3B, MAP2K4, CAMK2D, PRKCB, GAB1, CBLB, NRG1, FOXO1, NRAS, RPS6KB1, PAK6, ABL2, KRAS, GRB2, SOS1, MAP2K7, PDK1, HBEGF                                  |
| EGF/EGFR Signaling Pathway WP437                                     | 23/162  | $3.85 \times 10^{-6}$ | MEF2C, PRKCB, NCOA3, LIMK2, GAB1, CBLB, AP2B1, MAPK14, FOXO1, EPS8, RPS6KA5, CREB1, RPS6KB1, SP1, NEDD4, REPS2, FOSB, SPRY2, GRB2, KRAS, SOS1, MAP3K4, ARF6    |
| Insulin Signaling WP481                                              | 22/160  | $9.30 \times 10^{-6}$ | MAP2K4, GSK3B, PRKAA2, IRS1, PRKCB, INSR, GAB1, CBLB, SORBS1, FOXO3, MAPK14, FOXO1, RPS6KA5, TBC1D4, RPS6KB1, KIF3A, GRB2, MAP2K7, SOS1, MAP3K4, MAP3K12, ARF6 |
| Sterol Regulatory Element-Binding Proteins (SREBP) signalling WP1982 | 14/69   | $1.27 \times 10^{-5}$ | PRKAA2, HMGCS1, LPL,                                                                                                                                           |

|                                                          |        |                       |                                                                                                                                                            |
|----------------------------------------------------------|--------|-----------------------|------------------------------------------------------------------------------------------------------------------------------------------------------------|
|                                                          |        |                       | ACLY, CREB1,<br>RNF139, GPAM,<br>SP1, FASN,<br>PPARG, LPIN1,<br>LDLR, KPNB1,<br>PPARGC1B                                                                   |
| Signaling Pathways in Glioblastoma<br>WP2261             | 15/82  | $1.55 \times 10^{-5}$ | MAP2K4, IRS1,<br>PRKCB, GAB1,<br>FOXO3, FOXO1,<br>NRAS, CDK6, NF1,<br>SPRY2, MDM4,<br>KRAS, GRB2,<br>MAP2K7, MET                                           |
| <b>Adipogenesis WP236</b>                                | 18/130 | $5.93 \times 10^{-5}$ | MEF2C, IRS1,<br>EPAS1, CELF1,<br>LPL, RORA, LIFR,<br>GATA2, FOXO1,<br>KLF7, CREB1, SP1,<br>RARA, ID3,<br>PPARG, IL6ST,<br>LPIN1, LPIN2                     |
| Angiopoietin Like Protein 8<br>Regulatory Pathway WP3915 | 18/132 | $5.93 \times 10^{-5}$ | MAP2K4, GSK3B,<br>THRB, PRKAA2,<br>IRS1, INSR, LPL,<br>CBLB, FOXO3,<br>MAPK14, FOXO1,<br>RPS6KA5,<br>RPS6KB1, FASN,<br>MAP2K7, SOS1,<br>MAP3K4,<br>MAP3K12 |
| TGF-beta Signaling Pathway WP366                         | 18/132 | $5.93 \times 10^{-5}$ | SMAD2, MAP2K4,<br>MEF2C, LIMK2,<br>FN1, NUP153,<br>MAPK14,<br>TGFBR1, TGFBR3,<br>SP1, FOSB, GRB2,<br>DCP1A, SOS1,<br>MET, RNF111,<br>ATF3, PDK1            |
| MECP2 and Associated Rett<br>Syndrome WP3584             | 12/62  | $7.50 \times 10^{-5}$ | MEF2C, CREB1,<br>ARHGEF26, SP1,                                                                                                                            |

|                                                                  |        |                       |                                                                                                                                                                                                                                        |
|------------------------------------------------------------------|--------|-----------------------|----------------------------------------------------------------------------------------------------------------------------------------------------------------------------------------------------------------------------------------|
|                                                                  |        |                       | HNRNPF, TET3,<br>NF1, TET1, CTCF,<br>NREP, POU3F2,<br>CDON                                                                                                                                                                             |
| MAPK Signaling Pathway WP382                                     | 25/246 | $1.26 \times 10^{-4}$ | CACNA1A,<br>DUSP16, PPP3R1,<br>NRAS, RPS6KA5,<br>MKNK2,<br>MAP2K7,<br>MAP3K4,<br>MAP2K4, MEF2C,<br>GNG12, MAPK14,<br>TGFB1, CDC25B,<br>CACNB2,<br>MAPKAPK3,<br>TAOK1, RASA2,<br>NF1, RAPGEF2,<br>GRB2, TAB2,<br>KRAS, SOS1,<br>MAP3K12 |
| Nanoparticle-mediated activation of<br>receptor signaling WP2643 | 8/28   | $1.50 \times 10^{-4}$ | NRAS, PXN,<br>ITGA1, FN1,<br>KRAS, GRB2,<br>MAPK14, SOS1                                                                                                                                                                               |
| VEGFA-VEGFR2 Signaling Pathway<br>WP3888                         | 24/236 | $1.53 \times 10^{-4}$ | MAP2K4, GSK3B,<br>MEF2C, NRP2,<br>EGR3, PRKAA2,<br>PRKCB, PXN,<br>GAB1, PTPRJ,<br>FOXO3, MAPK14,<br>F3, FOXO1, DLL4,<br>RPS6KA5, CREB1,<br>RPS6KB1, GIPC1,<br>PTPN9, GRB2,<br>MAP2K7, HBEGF,<br>ARF6                                   |
| Energy Metabolism WP1541                                         | 10/47  | $1.53 \times 10^{-4}$ | GSK3B, PPP3R1,<br>MEF2C, PRKAA2,<br>CREB1, PPARG,<br>FOXO3, MAPK14,<br>FOXO1,<br>PPARGC1B                                                                                                                                              |



|                                                             |        |                       |                                                                                                                                                   |
|-------------------------------------------------------------|--------|-----------------------|---------------------------------------------------------------------------------------------------------------------------------------------------|
| Wnt Signaling Pathway WP363                                 | 10/52  | $3.69 \times 10^{-4}$ | GSK3B, CDK6,<br>APC, PRKCB,<br>DVL2, ROR1,<br>PPARG, PIP5K1B,<br>CSNK1G1, LRP6                                                                    |
| Oncostatin M Signaling Pathway<br>WP2374                    | 11/65  | $4.34 \times 10^{-4}$ | CREB1, IRS1,<br>PRKCB, PXN, LIFR,<br>KRAS, GRB2,<br>IL6ST, SOS1,<br>MAPK14, LDLR                                                                  |
| Pathways Affected in Adenoid Cystic<br>Carcinoma WP3651     | 11/65  | $4.34 \times 10^{-4}$ | FBXW7, NFIB,<br>KMT2C, NSD1,<br>ATRX, JMJD1C,<br>ARID5B, BCOR,<br>BCORL1, FOXO3,<br>FOXP2                                                         |
| Integrated Breast Cancer Pathway<br>WP1984                  | 17/151 | $7.21 \times 10^{-4}$ | SMAD2, IRS1,<br>NCOA3, MYCBP2,<br>PHB, TFPI,<br>FOXO1, TGFB1,<br>CDC25B, HIPK2,<br>EDAR, ITPKC,<br>CASP8, CREB1,<br>SP1, NF1, KRAS                |
| Ras Signaling WP4223                                        | 19/184 | $8.11 \times 10^{-4}$ | SHC4, KSR1,<br>PRKCB, INSR,<br>GAB1, RASAL2,<br>GNG12, NRAS,<br>RASSF5, RASA2,<br>NF1, ABL2, PAK6,<br>GRB2, KRAS,<br>SOS1, RGL2, MET,<br>ARF6     |
| Focal<br>Adhesion-PI3K-Akt-mTOR-signaling<br>pathway WP3932 | 26/303 | $8.54 \times 10^{-4}$ | PHLPP2, GSK3B,<br>PRKAA2, CAB39,<br>CSF1, EPAS1,<br>IRS1, FOXO3,<br>FOXO1, NRAS,<br>RELN, ITGB8,<br>INSR, FN1,<br>GNG12, KITLG,<br>CREB1, COL5A1, |

|                                                                                             |        |        |                                                                                                                                          |
|---------------------------------------------------------------------------------------------|--------|--------|------------------------------------------------------------------------------------------------------------------------------------------|
|                                                                                             |        |        | RPS6KB1, RAB14,<br>LPAR6, GRB2,<br>KRAS, ITGA5,<br>SOS1, MET                                                                             |
| Epithelial to mesenchymal transition<br>in colorectal cancer WP4239                         | 17/159 | 0.0012 | SMAD2, MAP2K4,<br>GSK3B, FZD3,<br>NRP2, FZD4,<br>EIF5A2, FN1,<br>NR2C2, MAPK14,<br>TGFB1, LRP6,<br>DLL4, GRB2,<br>KRAS, ITGA5,<br>SOS1   |
| Brain-Derived Neurotrophic Factor<br>(BDNF) signaling pathway WP2380                        | 16/144 | 0.0012 | SHC4, GSK3B,<br>MEF2C, PRKAA2,<br>KSR1, CRTC1,<br>IRS1, FOXO3,<br>MAPK14,<br>MARCKS,<br>RPS6KA5, CREB1,<br>APC, RPS6KB1,<br>GRB2, CDK5R1 |
| Extracellular vesicle-mediated<br>signaling in recipient cells WP2870                       | 7/30   | 0.0013 | SMAD2, TGFB3,<br>NRAS, APC, KRAS,<br>MET, TGFB1                                                                                          |
| Genotoxicity pathway WP4286                                                                 | 10/63  | 0.0013 | ACTA2, ITPKC,<br>BTG2, DAAM1,<br>RBM12B,<br>GXYLT1,<br>RAPGEF2, CBLB,<br>SMAD5, E2F7                                                     |
| Leptin signaling pathway WP2034                                                             | 11/76  | 0.0013 | GSK3B, CREB1,<br>PRKAA2,<br>RPS6KB1, IRS1,<br>SP1, PDE3B,<br>GRB2, SOS1,<br>MAPK14, FOXO1                                                |
| Factors and pathways affecting<br>insulin-like growth factor (IGF1)-Akt<br>signaling WP3850 | 7/31   | 0.0013 | SMAD2, GSK3B,<br>MSTN, RPS6KB1,<br>IRS1, ACVR2B,<br>PDK1                                                                                 |
| Transcription factor regulation in                                                          | 6/22   | 0.0013 | CREB1, IRS1,                                                                                                                             |

|                                                                          |        |        |                                                                                                              |
|--------------------------------------------------------------------------|--------|--------|--------------------------------------------------------------------------------------------------------------|
| adipogenesis WP3599                                                      |        |        | INSR, PPARG,<br>LPIN1, FOXO1                                                                                 |
| Insulin signalling in human<br>adipocytes (diabetic condition)<br>WP3635 | 4/8    | 0.0013 | TBC1D4,<br>RPS6KB1, IRS1,<br>INSR                                                                            |
| Insulin signalling in human<br>adipocytes (normal condition)<br>WP3634   | 4/8    | 0.0013 | TBC1D4,<br>RPS6KB1, IRS1,<br>INSR                                                                            |
| White fat cell differentiation<br>WP4149                                 | 7/32   | 0.0015 | CREB1, IRF4,<br>RARA, RORA,<br>PPARG, GATA2,<br>FOXO1                                                        |
| Thermogenesis WP4321                                                     | 13/108 | 0.0017 | KDM3A, PRKAA2,<br>ADCY3, MAPK14,<br>ARID1B, ADCY6,<br>NRAS, CREB1,<br>RPS6KB1, GRB2,<br>PPARG, KRAS,<br>SOS1 |
| DNA Damage Response (only ATM<br>dependent) WP710                        | 13/110 | 0.0020 | GSK3B, IRS1,<br>INSR, FOXO3,<br>NRAS, APC, DVL2,<br>GRB2, KRAS,<br>SOS1, LDLR,<br>MAP3K4, PDK1               |
| BDNF-TrkB Signaling WP3676                                               | 7/34   | 0.0020 | NRAS, CREB1,<br>RPS6KB1, GAB1,<br>KRAS, GRB2,<br>SOS1                                                        |
| B Cell Receptor Signaling Pathway<br>WP23                                | 12/97  | 0.0021 | GSK3B, MEF2C,<br>CREB1, PRKCB,<br>IRF4, GAB1,<br>PIP5K1B, GRB2,<br>SOS1, MAPK14,<br>FOXO1, GTF2I             |
| Aryl Hydrocarbon Receptor WP2586                                         | 8/46   | 0.0023 | RET, NRAS, NF1,<br>LPL, CYP1B1,<br>NCOA7, KRAS,<br>NFE2L2                                                    |
| Kit receptor signaling pathway<br>WP304                                  | 9/59   | 0.0026 | KITLG, RPS6KB1,<br>PRKCB, MITF,<br>GRB2, SOS1,                                                               |

|                                                       |        |        |                                                                                                                   |
|-------------------------------------------------------|--------|--------|-------------------------------------------------------------------------------------------------------------------|
|                                                       |        |        | FOXO3, SOCS6,<br>MAPK14                                                                                           |
| Canonical and Non-Canonical TGF-B<br>signaling WP3874 | 5/17   | 0.0026 | SMAD2, GREM1,<br>LOX, MAPK14,<br>TGFB1                                                                            |
| ESC Pluripotency Pathways WP3931                      | 13/116 | 0.0028 | ACVR1, GSK3B,<br>FZD3, FZD4,<br>GAB1, LIFR,<br>SMAD5, LRP6,<br>APC, DVL2, GRB2,<br>IL6ST, SOS1                    |
| Regulation of Actin Cytoskeleton<br>WP51              | 15/150 | 0.0034 | PPP1R12A, PXN,<br>ITGA1, FN1,<br>MSN, GNG12,<br>ENAH, GNA13,<br>NRAS, APC, PAK6,<br>PIP5K1B, KRAS,<br>SOS1, MYH10 |
| Nuclear Receptors WP170                               | 7/38   | 0.0034 | THRB, RARA,<br>RORA, NR1D2,<br>PPARG, ROR1,<br>NR2C2                                                              |
| Hippo-Merlin Signaling<br>Dysregulation WP4541        | 13/120 | 0.0036 | PPP1R12A, INSR,<br>ITGA1, LIN28B,<br>NRAS, CDH11,<br>CDH24, ITGB8,<br>PAK6, KRAS,<br>ITGA5, TEAD1,<br>MET         |
| Breast cancer pathway WP4262                          | 15/154 | 0.0041 | SHC4, GSK3B,<br>FZD3, NCOA3,<br>LRP6, DLL4,<br>NRAS, CDK6,<br>APC, RPS6KB1,<br>SP1, DVL2, GRB2,<br>KRAS, SOS1     |
| TNF alpha Signaling Pathway WP231                     | 11/92  | 0.0041 | MAP2K4, NRAS,<br>CASP8, APAF1,<br>KSR1, TNFAIP3,<br>KRAS, TAB2,<br>GRB2, SOS1,<br>MAP2K7                          |

|                                                                                                |        |        |                                                                                                                         |
|------------------------------------------------------------------------------------------------|--------|--------|-------------------------------------------------------------------------------------------------------------------------|
| MAPK Cascade WP422                                                                             | 6/29   | 0.0042 | MAP2K4, NRAS,<br>KRAS, MAP2K7,<br>MAPK14,<br>MAP3K12                                                                    |
| AGE/RAGE pathway WP2324                                                                        | 9/66   | 0.0046 | SMAD2, CASP8,<br>IRS1, PRKCB, SP1,<br>INSR, MSN,<br>MAPK14, FOXO1                                                       |
| Association Between<br>Physico-Chemical Features and<br>Toxicity Associated Pathways<br>WP3680 | 9/66   | 0.0046 | GSK3B, MAP2K4,<br>FZD3, DAAM1,<br>APC, FZD4, FN1,<br>GRB2, SOS1                                                         |
| Non-small cell lung cancer WP4255                                                              | 9/66   | 0.0046 | NRAS, CDK6,<br>PRKCB, RASSF5,<br>KRAS, GRB2,<br>SOS1, FOXO3,<br>PDK1                                                    |
| PI3K-AKT-mTOR signaling pathway<br>and therapeutic opportunities<br>WP3844                     | 6/30   | 0.0047 | GSK3B, NRAS,<br>KRAS, FOXO3,<br>FOXO1, PDK1                                                                             |
| Hematopoietic Stem Cell<br>Differentiation WP2849                                              | 8/55   | 0.0056 | KITLG, THRB,<br>CSF1, FOSB,<br>IKZF1, GATA2,<br>CBFA2T3, RUNX1                                                          |
| Neovascularisation processes<br>WP4331                                                         | 5/21   | 0.0056 | SMAD2, DLL4,<br>EPHB2, SMAD5,<br>TGFB1                                                                                  |
| IL-6 signaling pathway WP364                                                                   | 7/43   | 0.0058 | GSK3B, MAP2K4,<br>RPS6KB1, GAB1,<br>GRB2, IL6ST,<br>SOS1                                                                |
| Mesodermal Commitment Pathway<br>WP2857                                                        | 14/147 | 0.0063 | ACVR1, SMAD2,<br>CRTC1, FZD4,<br>ARID5B, TET1,<br>HTT, ACVR2B,<br>ACVR2A,<br>ADAM19, CSRP2,<br>BCORL1, TEAD1,<br>NFE2L2 |
| Estrogen Receptor Pathway WP2881                                                               | 4/13   | 0.0063 | GPAM, SP1,<br>PDK4, CYP1B1                                                                                              |
| Wnt Signaling WP428                                                                            | 12/115 | 0.0063 | GSK3B, SFRP1,                                                                                                           |

|                                                                  |        |        |                                                                                                                                                                                                |
|------------------------------------------------------------------|--------|--------|------------------------------------------------------------------------------------------------------------------------------------------------------------------------------------------------|
|                                                                  |        |        | PPP3R1, FZD3,<br>CAMK2D,<br>DAAM1, APC,<br>PRKCB, DVL2,<br>PRICKLE2, ROR1,<br>LRP6                                                                                                             |
| Type II diabetes mellitus WP1584                                 | 5/22   | 0.0064 | GK, IRS1, INSR,<br>CACNA1A, SOCS4                                                                                                                                                              |
| miRNA regulation of prostate cancer<br>signaling pathways WP3981 | 6/33   | 0.0068 | GSK3B, PLCL2,<br>KRAS, GRB2,<br>SOS1, FOXO1                                                                                                                                                    |
| Prostaglandin Synthesis and<br>Regulation WP98                   | 7/45   | 0.0069 | PTGFR, EDNRA,<br>PTGER3, MITF,<br>PPARG, PTGFRN,<br>PPARGC1B                                                                                                                                   |
| MET in type 1 papillary renal cell<br>carcinoma WP4205           | 8/59   | 0.0075 | NRAS, GAB1,<br>PAK6, KRAS,<br>GRB2, STRN,<br>SOS1, MET                                                                                                                                         |
| Signaling of Hepatocyte Growth<br>Factor Receptor WP313          | 6/34   | 0.0075 | PXN, ITGA1,<br>GAB1, GRB2,<br>SOS1, MET                                                                                                                                                        |
| p38 MAPK Signaling Pathway WP400                                 | 6/34   | 0.0075 | MAP2K4,<br>RPS6KA5, CREB1,<br>GRB2, MAPK14,<br>TGFB1                                                                                                                                           |
| PI3K-Akt Signaling Pathway WP4172                                | 24/340 | 0.0089 | PHLPP2, GSK3B,<br>PRKAA2, CSF1,<br>IRS1, INSR,<br>ITGA1, FN1,<br>GNG12, FOXO3,<br>NRAS, KITLG,<br>RELN, G6PC3,<br>CDK6, CREB1,<br>RPS6KB1, LPAR6,<br>ITGB8, GRB2,<br>KRAS, ITGA5,<br>SOS1, MET |
